# Supplementary material for: Climate Change Influences on the Global Potential Distribution of the Mosquito Culex quinquefasciatus, Vector of West Nile Virus and Lymphatic Filariasis
Source: PLOS journal article supplement (doi:10.1371/journal.pone.0163863), 2016-10-03
Supplement: S6 (10.1371/journal.pone.0163863.s006) [file journal.pone.0163863.s006]

Archive with 2 entries (2 files):
- doc.kml
- Layer0.png
