# Supplementary material for: Climate Change Influences on the Global Potential Distribution of the Mosquito Culex quinquefasciatus, Vector of West Nile Virus and Lymphatic Filariasis
Source: PLOS journal article supplement (doi:10.1371/journal.pone.0163863), 2016-10-03
Supplement: S6 (10.1371/journal.pone.0163863.s006) [file journal.pone.0163863.s006 › doc.kml]

<?xml version="1.0" encoding="UTF-8"?>
<kml xmlns="http://www.opengis.net/kml/2.2" xmlns:gx="http://www.google.com/kml/ext/2.2" xmlns:xsi="http://www.w3.org/2001/XMLSchema-instance"
 xsi:schemaLocation="http://www.opengis.net/kml/2.2 http://schemas.opengis.net/kml/2.2.0/ogckml22.xsd http://www.google.com/kml/ext/2.2 http://code.google.com/apis/kml/schema/kml22gx.xsd">
<Document id="cx_quin_60">
  <name>cx_quin_60</name>
  <Snippet></Snippet>
  <GroundOverlay id="0">
    <Snippet></Snippet>
    <drawOrder>1000</drawOrder>
    <name>cx_quin_60</name>
    <Icon>
      <href>Layer0.png</href>
      <viewBoundScale>1.0</viewBoundScale>
    </Icon>
    <LatLonBox>
      <north>105.0000086052081</north>
      <south>-75.00000078229166</south>
      <east>216.0000206524993</east>
      <west>-216.0000018774999</west>
      <rotation>0</rotation>
    </LatLonBox>
  </GroundOverlay>
</Document>
</kml>
