# Supplementary figures and images for: Climate Change Influences on the Global Potential Distribution of the Mosquito Culex quinquefasciatus, Vector of West Nile Virus and Lymphatic Filariasis
Source: PLOS journal article supplement (doi:10.1371/journal.pone.0163863), 2016-10-03

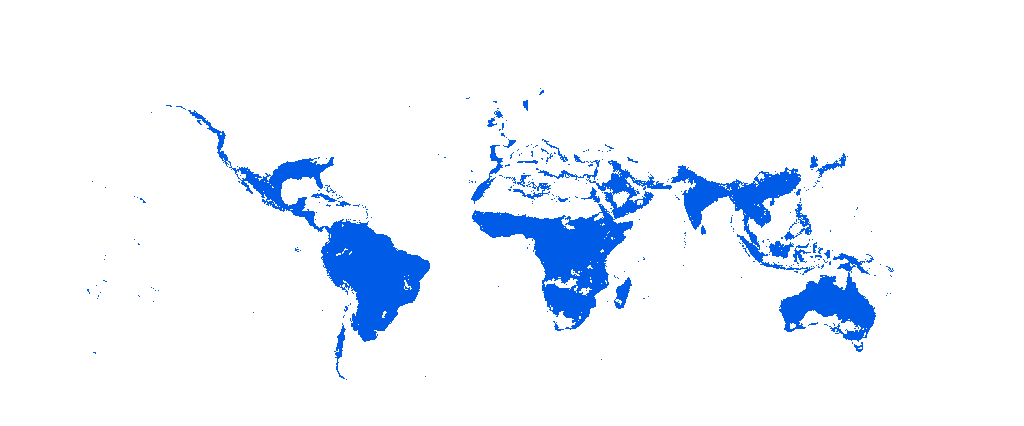

Supplement: S3 (10.1371/journal.pone.0163863.s003) [file journal.pone.0163863.s003 › Layer0.png]

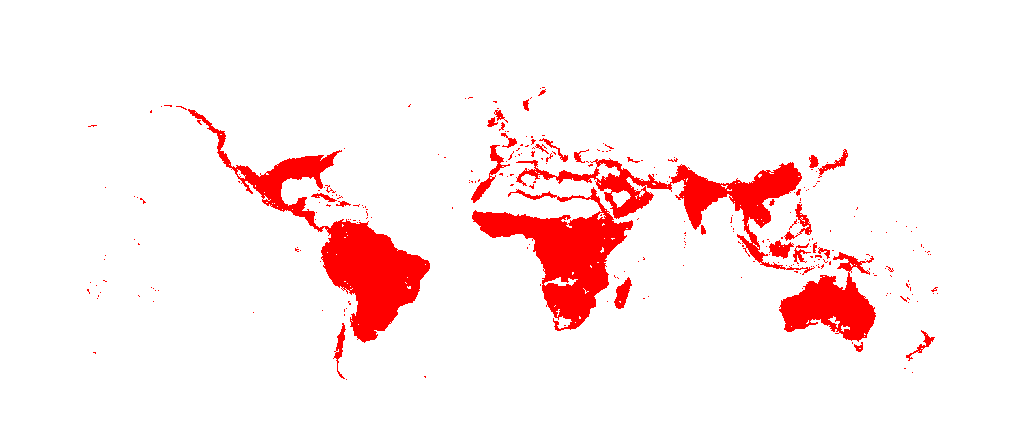

Supplement: S4 (10.1371/journal.pone.0163863.s004) [file journal.pone.0163863.s004 › Layer0.png]

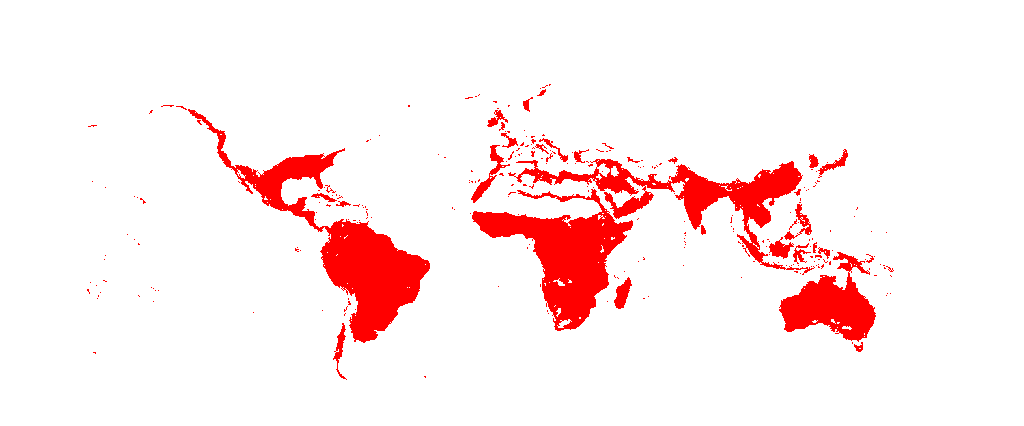

Supplement: S5 (10.1371/journal.pone.0163863.s005) [file journal.pone.0163863.s005 › Layer0.png]

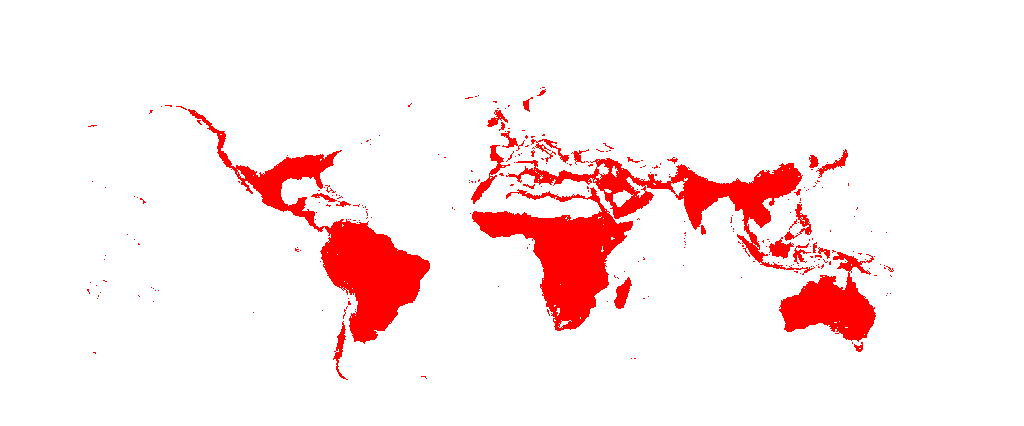

Supplement: S6 (10.1371/journal.pone.0163863.s006) [file journal.pone.0163863.s006 › Layer0.png]

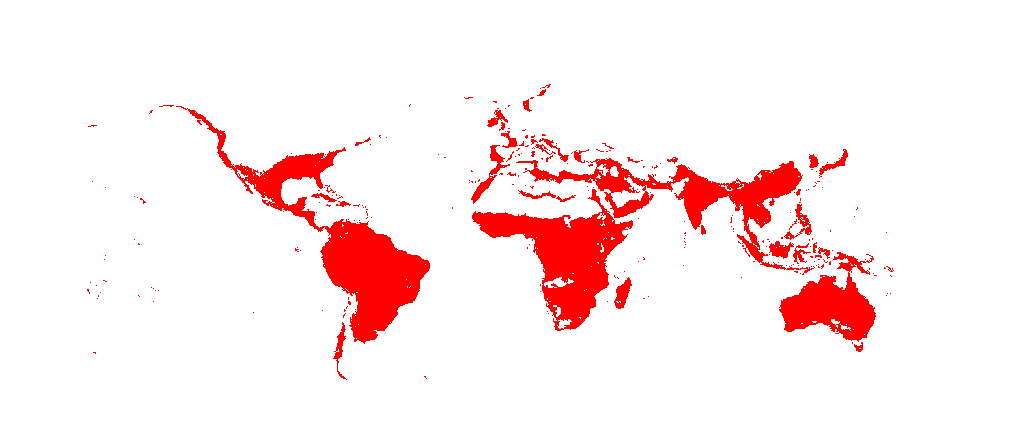

Supplement: S7 (10.1371/journal.pone.0163863.s007) [file journal.pone.0163863.s007 › Layer0.png]
